# Supplementary material for: Enhanced visible light photocatalytic hydrogen production over poly(dibenzothiophene-S,S-dioxide)-based heterostructures decorated by Earth-abundant layered double hydroxides
Source: Royal Society of Chemistry journal article supplement (doi:10.1039/d2dt01465c), 2022-01-01
Supplement: d2dt01465c1.pdf [file d2dt01465c1.pdf]

## Electronic Supplementary Information

### **Enhanced visible light photocatalytic hydrogen production over poly(dibenzothiophene-S,S-dioxide)-based heterostructures decorated by earth-abundant layered double hydroxides**

Jingsong Luo, Jun Wu, Yuxiang Liu, Jiahuan Yuan and Feng Wang\*

*School of Chemical Engineering and Pharmacy, Wuhan Institute of Technology, Wuhan 430205, P. R. China.*

\* *Corresponding author. E-mail: pswang@wit.edu.cn (F. Wang)*

#### **Experimental section**

##### **Materials**

All chemicals used in this work were purchased from Aladdin Reagent Co., Ltd.  $\text{Ni}(\text{NO}_3)_2 \cdot 6\text{H}_2\text{O}$ ,  $\text{Fe}(\text{NO}_3)_3 \cdot 9\text{H}_2\text{O}$ , NaOH,  $\text{Na}_2\text{CO}_3$ , and  $\text{Pd}(\text{PPh}_3)_4(0)$  were used as received without further purification.

##### **Synthesis of NiFeLDH**

NiFeLDH was synthesized using the coprecipitation method at room temperature with a molar ratio of  $\text{Ni}^{2+}/\text{Fe}^{3+} = 7$ .  $\text{Ni}(\text{NO}_3)_2 \cdot 6\text{H}_2\text{O}$  (8.143 g, 0.028 mol/L) and  $\text{Fe}(\text{NO}_3)_3 \cdot 9\text{H}_2\text{O}$  (1.616 g, 0.004 mol/L) were dissolved in 20 mL deionized water to obtain a metal salt solution. Then NaOH (1.5 mol/L, 5 mL) and  $\text{Na}_2\text{CO}_3$  (0.015 mol/L, 10 mL) were added dropwise into the solution until  $\text{pH} = 9$ . The resulting slurry was stirred vigorously for 24 h at room temperature and then the precipitate formed was filtered and washed several times with distilled water to remove excess soluble ions until the pH of the filtrate reached 7. The washed precipitate was dried in an oven at 60 °C overnight and then it was crushed to powder form for further use.

##### **Synthesis of PSO@NiFeLDH**

The as-synthesized composites were named as PSO@NiFeLDH-X, where X stands for the feed mass ratio between dibenzothiophene-S,S-dioxide and NiFeLDH. The PSO@NiFeLDH-15 denotes dibenzothiophene-S, S-dioxide in the presence of

15% NiFeLDH. The following is a typical process for synthesizing PSO@NiFeLDH-15.

Under argon protection, 3,7-bis(4,4,5,5-tetramethyl-1,3,2-dioxaborolan-2-yl)dibenzothiophene-S,S-dioxide (234 mg, 0.5 mmol), 3,7-dibromodibenzothiophene-S,S-dioxide (187 mg, 0.5 mmol), Pd(PPh<sub>3</sub>)<sub>4</sub>(0) (15 mg, 0.012 mmol), and NiFeLDH (23.8 mg) were added into a mixture of DMF (40 mL) and Na<sub>2</sub>CO<sub>3</sub> (2 mol/L, 6 mL). The resulting mixture was heated to 150 °C with vigorous stirring for 72 h. The composite was recovered by filtration, continuously washed with distilled water and methanol, and ultimately dried overnight at 90 °C.

### **Photocatalytic activity evaluation**

The photocatalysis test was conducted on a Labsolar-6A circulation system (Beijing Perfectlight Technology Co., Ltd). A Xe lamp (300 W) was used as a light source for photocatalysis ( $\lambda > 420$  nm). Typically, 10 mg of photocatalyst was ultrasonically dispersed in 100 mL triethanolamine (TEOA) aqueous solution. The temperature was kept at 10 °C by flowing a cooling system for the test. The generated hydrogen was quantified using an online gas chromatograph (GC-7806, nitrogen carrier) equipped with a packed column and a flame ionization detector (FID) by the external standard method. The standard curve of hydrogen was exhibited in Fig. S20. The hydrogen sample generated by the photocatalytic reaction is fed into the Labsolar-6A all-glass automatic online gas analysis system, and the target gas is fed into the gas chromatography every hour to measure the amount of hydrogen produced through the all-glass online injection valve (Fig. S21).

### **Characterization**

Solid state <sup>13</sup>C CP-MAS NMR analysis was performed to confirm the chemical structure of PSO by a 400 MHz Bruker Advance instrument at a MAS rate of 10 kHz. Elemental analyses (C, H, O, S) were recorded on an Elementar Vario EL cube elemental analyzer. Powder X-ray diffraction (XRD) analysis was carried out on an X-ray diffractometer Rigaku Smart Lab. The fourier transform infrared (FT-IR) spectroscopy was collected on KBr disks using a Bruker Tensor II FT-IR spectrometer in transmission mode. The nanomorphology of the polymers was observed by field-

emission scanning electron microscopy (SEM, HITACHI, JSM-7001F) and high-resolution transmission electron microscopy (HRTEM, HITACHI, H-7650). The binding energies determined by X-ray photo-electron spectroscopy (XPS, PHI-Vesoprobe 5000 III) were corrected by reference to the adventitious carbon peak (284.8 eV) for each sample. UV–vis diffuse reflectance spectra (UV–vis DRS) were recorded on a SHIMADZU UV-2600 spectrophotometer. Photoluminescence (PL) spectra were measured under excitation wavelength at 420 nm (Shimadzu, F-7000 PC). Time-resolved PL was acquired on an Edinburgh FLS980 spectrophotometer. The ultraviolet photo-electron spectroscopy (UPS) was measured on Thermo ESCALAB XI+. The electron paramagnetic resonance (EPR) was carried out on CIQTEK EPR200-Plus. The content of Ni and Fe in sample was measured by Inductively Coupled Plasma–Mass Spectrometry (ICP-MS, Agilent 7700s). Thermogravimetric analysis (TGA) was performed by using a thermal analysis instrument (SDT-Q600) and the samples were heated up to 700 °C at a rate of 10 °C min<sup>-1</sup> under nitrogen atmosphere for each sample. The solid surface area were calculated from N<sub>2</sub> adsorption isotherms, measured at 77 K on QUADRASORB evo. The Barret-Joyner-Halenda (BJH) model was used to get Brunauer-Emmett-Teller (BET)-specific surface area and the average pore size.

### **Apparent quantum yield (AQY) measurement**

The AQY measurement for the photocatalytic experiment was carried out using monochromatic Xe lamp (300 W) with band pass filter. The light intensities at 420, 450, and 500 nm are 29.1, 30.6, 39.2 mW cm<sup>-2</sup>, respectively. During the photocatalysis, PSO@NiFeLDH-15 (10 mg) nanocomposite was suspended in 100 mL aqueous solution in the presence of TEOA (20 vol%). The AQY was calculated based on following equation:

$$AQY(\%) = \frac{2 \times \text{Number of evolved } H_2 \text{ molecules}}{\text{Number of incident photons}} \times 100\%$$

### **Electrochemical measurement**

The electrochemical impedance spectroscopy (EIS) and cyclic voltammetry (CV) were measured for the photoelectrochemical properties using a CHI 600 electrochemical workstation (Shanghai, China). A three-electrode cell system was

immersed into electrolyte solution with  $\text{Bu}_4\text{NPF}_6$  acetonitrile solution. The samples were prepared by the mixture slurry of polymer and 5 wt% Nafion. The resulting slurry was coated on a glass substrate and dried at 50 °C under vacuum before the measurement. A platinum plate and a saturated calomel electrode (SCE) as were used as the counter electrode and reference electrode, respectively. CV measurements were conducted at a scan rate of 50 mV/s under nitrogen atmosphere. The ferrocene/ferrocenium ( $\text{Fc}/\text{Fc}^+$ ) reference was used as an internal standard, which was assigned an absolute energy of  $-4.8$  eV vs vacuum level. The lowest unoccupied molecular orbital (LUMO) energy levels and the highest occupied molecular orbital (HOMO) energy levels of polymers were calculated by the empirical formulas of  $E_{\text{HOMO}} = -e(E_{\text{ox}} + 4.8 - E_{1/2}^{\text{(Fc/Fc+)}})$  (eV) and  $E_{\text{LUMO}} = -e(E_{\text{re}} + 4.8 - E_{1/2}^{\text{(Fc/Fc+)}})$  (eV) respectively, where  $E_{\text{re}}$  and  $E_{\text{ox}}$  are the onset of the reduction and oxidation potential vs SCE.

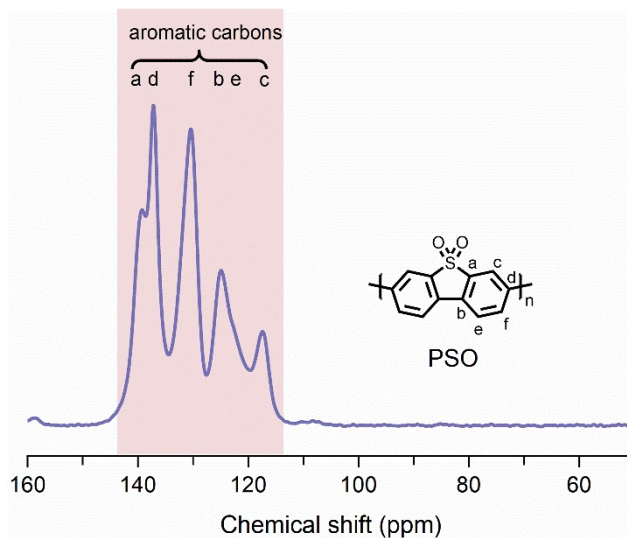

**Fig. S1** Solid-state  $^{13}\text{C}$  NMR spectra of PSO.

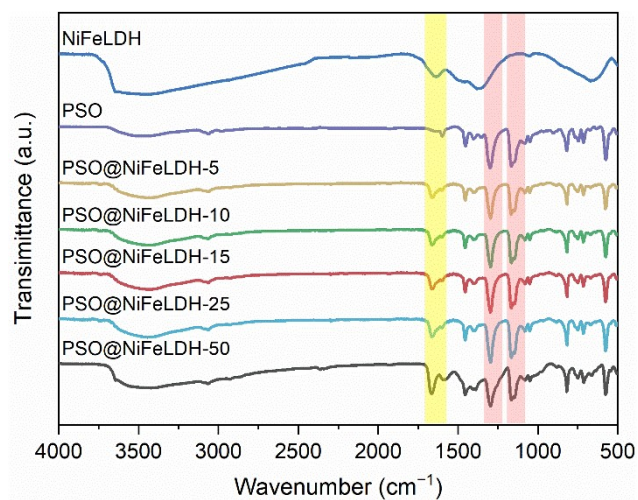

**Fig. S2** FT-IR spectra of NiFeLDH, PSO and PSO@NiFeLDH composites.

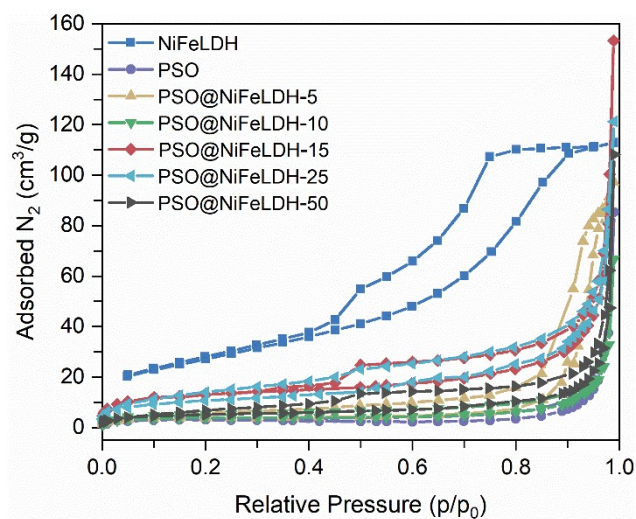

**Fig. S3** Nitrogen adsorption-desorption isotherms of NiFeLDH, PSO and PSO@NiFeLDH composite.

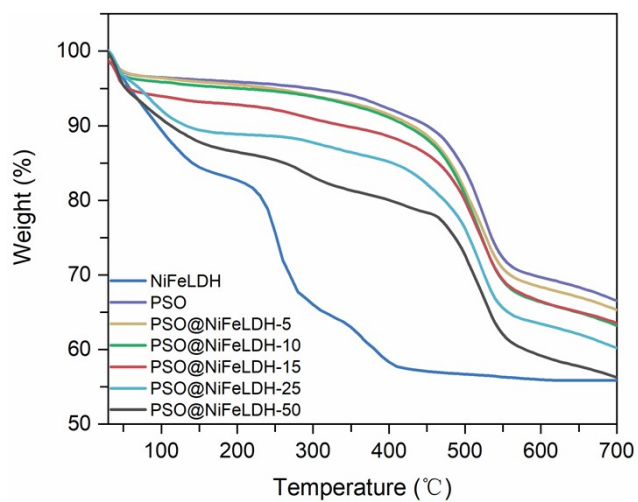

**Fig. S4** TGA of NiFeLDH, PSO and PSO@NiFeLDH composite.

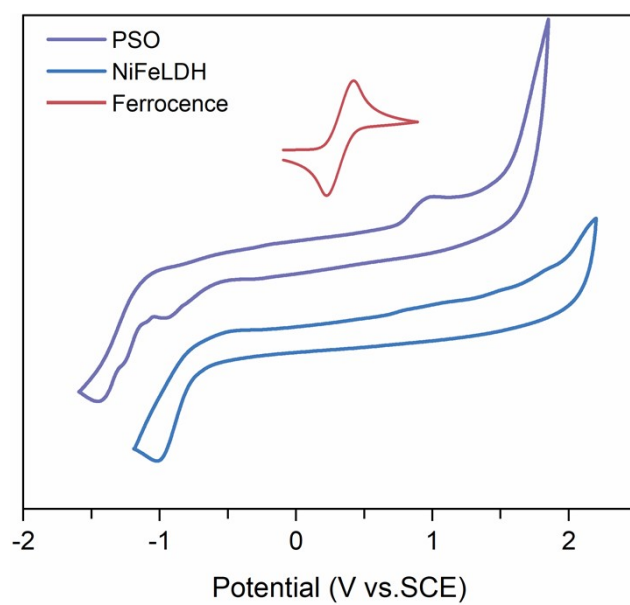

**Fig. S5** CV curves of NiFeLDH and PSO.

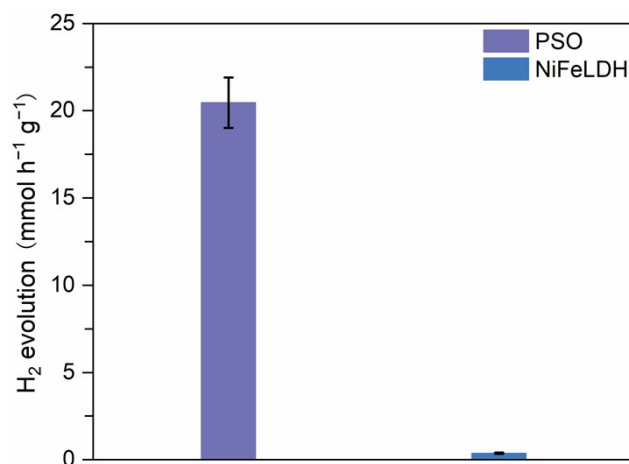

**Fig. S6** The HERs of NiFeLDH and PSO with TEOA under visible light irradiation.

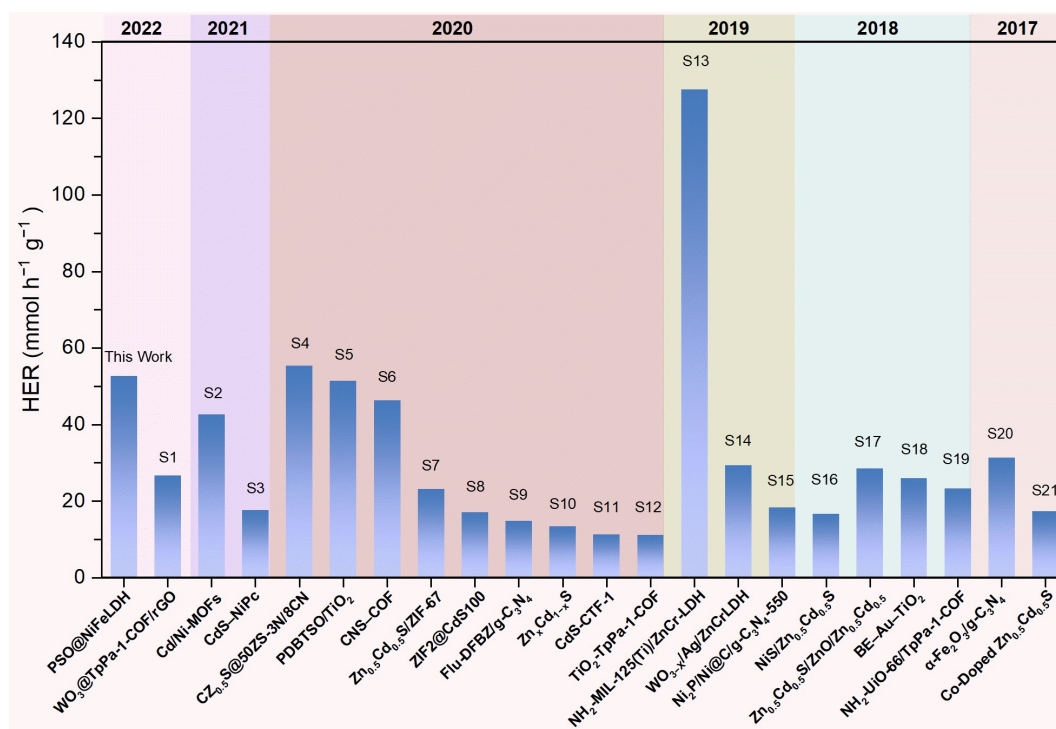

**Fig. S7** The HER for PSO@NiFeLDH in comparison with representative heterojunction photocatalysts. (HER > 10 mmol h<sup>-1</sup> g<sup>-1</sup>). The concrete test details are described in Table S5.

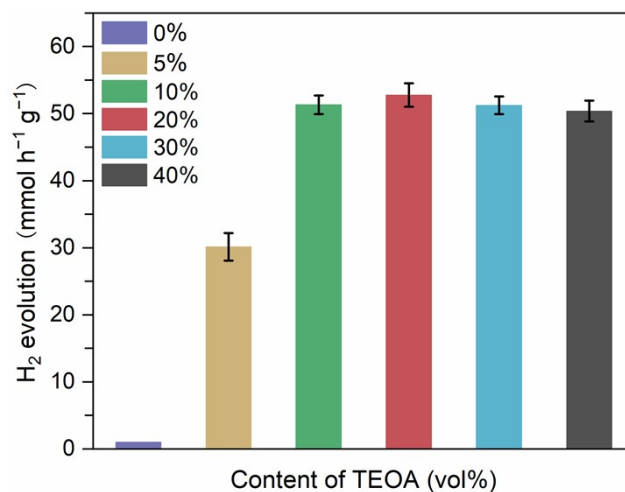

**Fig. S8** The HERs of PSO@NiFeLDH-15 with different concentration of TEOA under visible light irradiation.

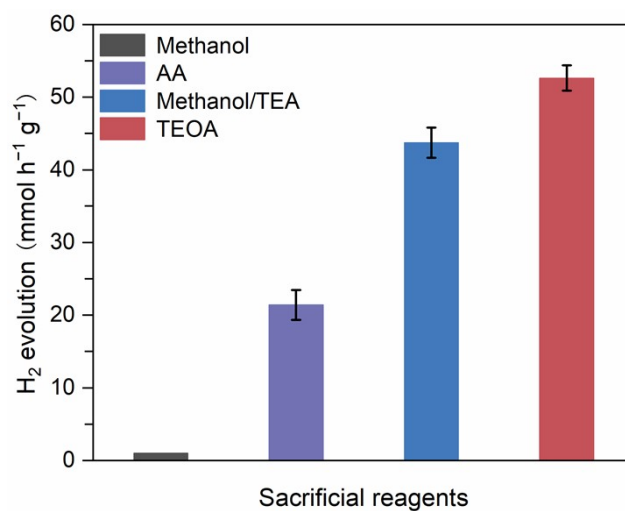

**Fig. S9** The HERs of PSO@NiFeLDH-15 with different sacrificial agent under visible light irradiation.



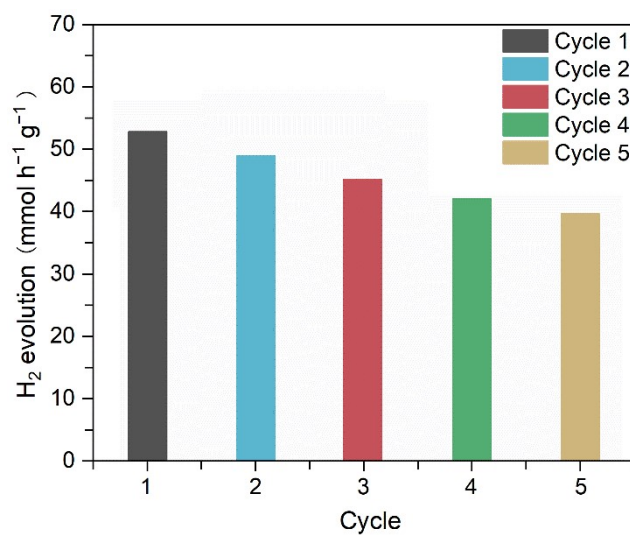

**Fig. S10** The HERs of PSO@NiFeLDH-15 composite for each cycle of stability test.

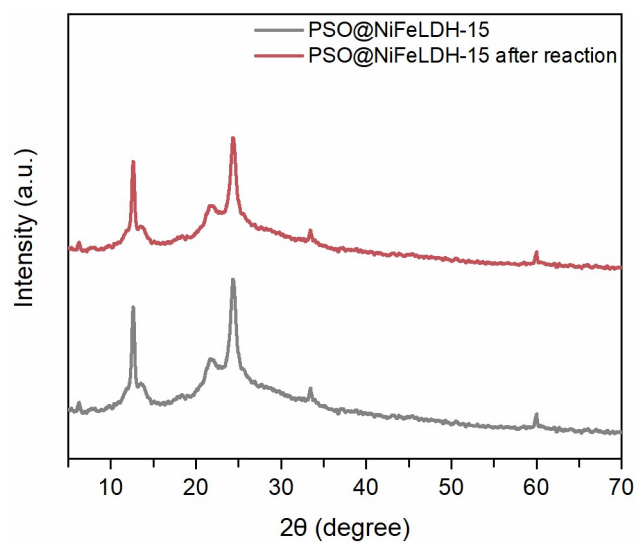

**Fig. S11** XRD patterns of PSO@NiFeLDH-15 before and after the photocatalytic reaction.

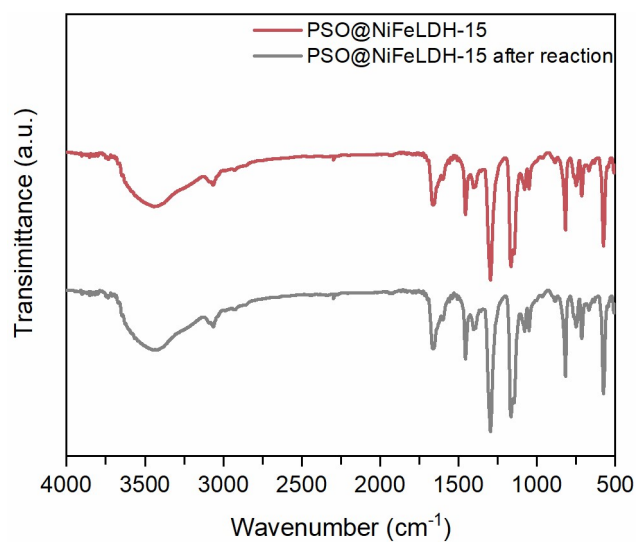

**Fig. S12** FT-IR spectra of PSO@NiFeLDH-15 before and after the photocatalytic reaction.

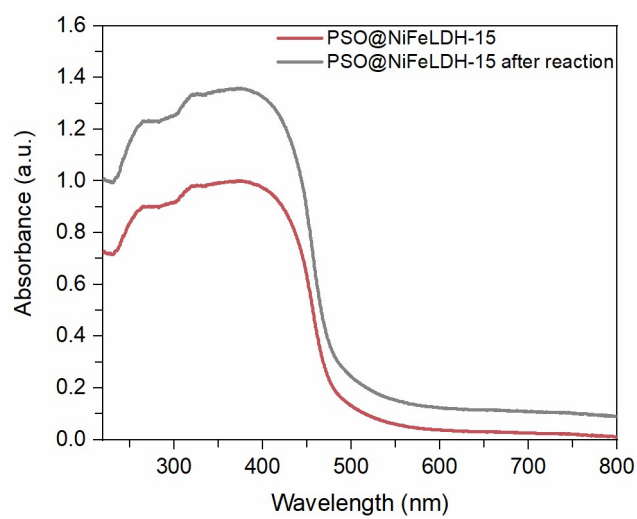

**Fig. S13** UV-vis DRS of PSO@NiFeLDH-15 before and after the photocatalytic reaction.

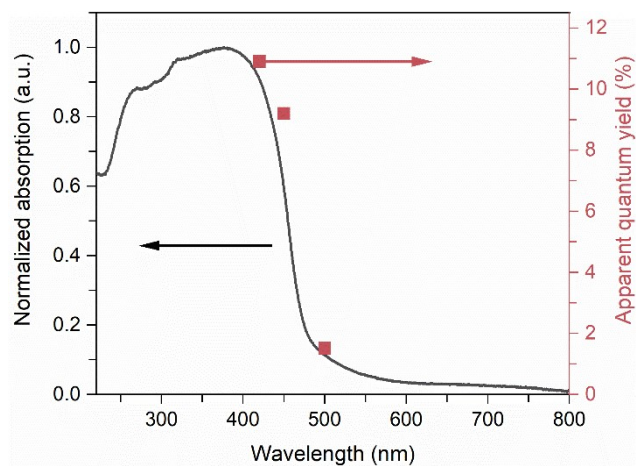

**Fig. S14** Wavelength dependence of AQY on hydrogen production and UV-vis absorption spectra of PSO@NiFeLDH-15.

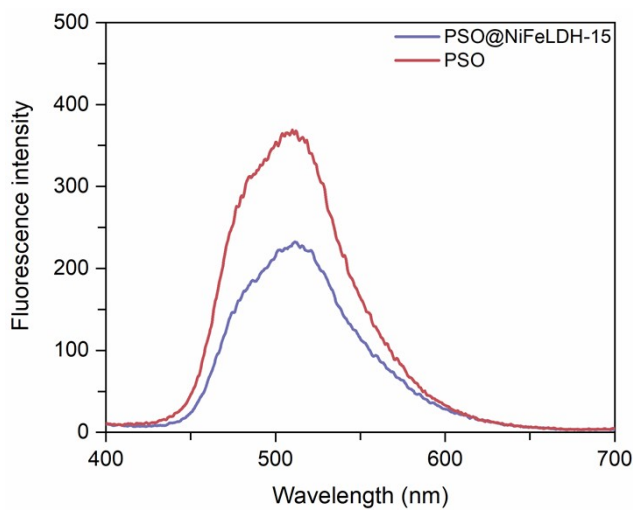

**Fig. S15** PL spectra of PSO and PSO@NiFeLDH-15.

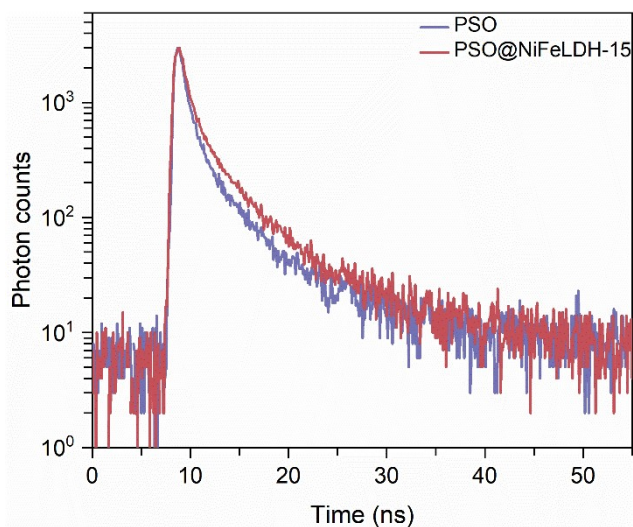

**Fig. S16** Time-resolved PL spectra of PSO and PSO@NiFeLDH-15.

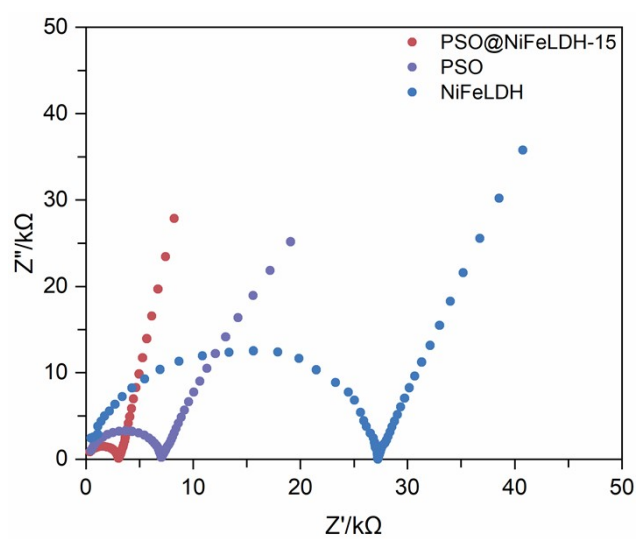

**Fig. S17** EIS spectroscopy of NiFeLDH, PSO and PSO@NiFeLDH-15.

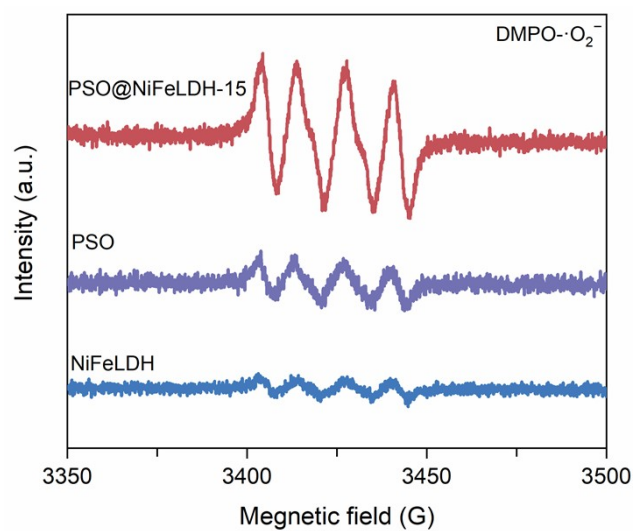

**Fig. S18** EPR spectra of  $\text{DMPO}\cdot\text{O}_2^-$  for NiFeLDH, PSO and PSO@NiFeLDH-15 composite with DMPO as free radical trapping agent.

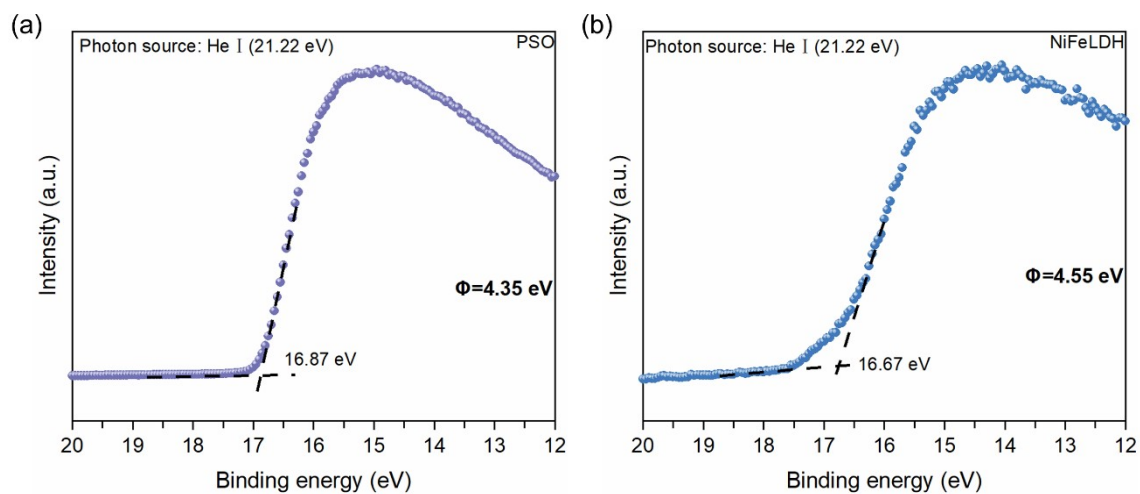

$\Phi = h\nu - E_{SE}$ , where  $E_{SE}$  is secondary edges,  $h\nu=21.22$  eV.

**Fig. S19** UPS spectra of (a) PSO and (b) NiFeLDH.

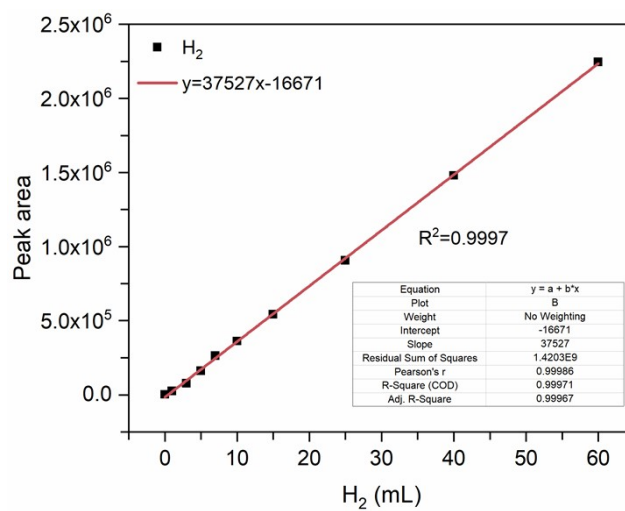

**Fig. S20** The standard curve of H<sub>2</sub> by GC (nitrogen as carrier gas) equipped with FID.

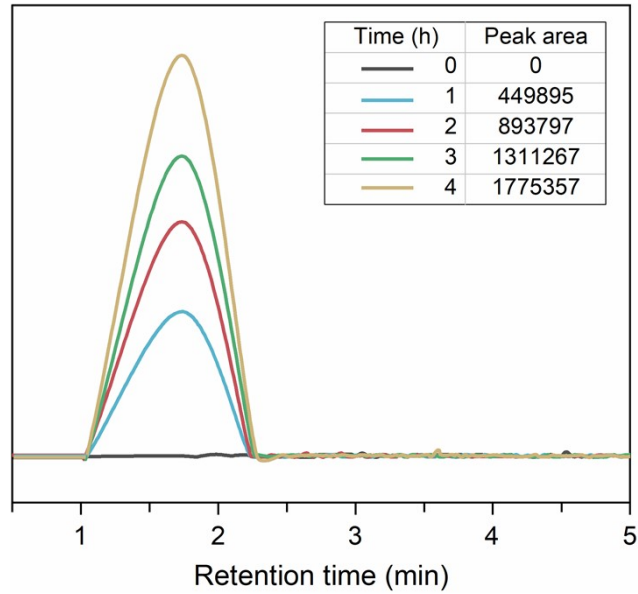

**Fig. S21** GC spectrum of H<sub>2</sub> under different reaction times.

**Table S1** Elemental analysis of PSO and PSO@NiFeLDH-15.

| Sample         | Theoretical data |       |       |      | Experimental data |       |       |      |
|----------------|------------------|-------|-------|------|-------------------|-------|-------|------|
|                | C(%)             | O(%)  | S(%)  | H(%) | C(%)              | O(%)  | S(%)  | H(%) |
| PSO            | 67.21            | 14.94 | 14.94 | 2.80 | 58.40             | 14.51 | 12.64 | 2.72 |
| PSO@NiFeLDH-15 | 57.13            | 18.09 | 12.69 | 2.72 | 53.69             | 21.76 | 10.88 | 2.48 |

**Table S2** The ICP-MS analysis for NiFeLDH and PSO@NiFeLDH composites.

| Sample         | Experimental data |        | Ni/Fe |
|----------------|-------------------|--------|-------|
|                | Ni (%)            | Fe (%) |       |
| NiFeLDH        | 40.12             | 5.59   | 7.17  |
| PSO@NiFeLDH-5  | 1.22              | 0.23   | 5.30  |
| PSO@NiFeLDH-10 | 3.18              | 0.47   | 6.76  |
| PSO@NiFeLDH-15 | 4.09              | 0.61   | 6.70  |
| PSO@NiFeLDH-25 | 4.67              | 0.68   | 6.86  |
| PSO@NiFeLDH-50 | 17.4              | 2.51   | 6.93  |

**Table S3** The surface properties of NiFeLDH, PSO and PSO@NiFeLDH.

| Sample         | $S_{\text{BET}}$ ( $\text{m}^2 \text{g}^{-1}$ ) | Average pore volume ( $\text{cm}^3 \text{g}^{-1}$ ) |
|----------------|-------------------------------------------------|-----------------------------------------------------|
| NiFeLDH        | 98.07                                           | 0.161                                               |
| PSO            | 12.22                                           | 0.133                                               |
| PSO@NiFeLDH-5  | 14.20                                           | 0.156                                               |
| PSO@NiFeLDH-10 | 16.38                                           | 0.132                                               |
| PSO@NiFeLDH-15 | 46.58                                           | 0.224                                               |
| PSO@NiFeLDH-25 | 38.04                                           | 0.182                                               |
| PSO@NiFeLDH-50 | 18.19                                           | 0.164                                               |

**Table S4** Optical and electrochemical properties of NiFeLDH and PSO.

| Sample  | Reduction potential (eV) | Oxidation potential (eV) | $E_{\text{LUMO(VB)}}$ (eV) | $E_{\text{HOMO(CB)}}$ (eV) | $E_{\text{g}}^{\text{a}}$ (eV) |
|---------|--------------------------|--------------------------|----------------------------|----------------------------|--------------------------------|
| NiFeLDH | -0.61                    | 1.59                     | -3.90                      | -6.10                      | 2.20                           |
| PSO     | -1.13                    | 1.43                     | -3.38                      | -5.94                      | 2.56                           |

$E_{\text{HOMO(CB)}} = -e(E_{\text{ox}} + 4.8 - E_{1/2}^{\text{(Fc/Fc+)}})$  (eV) and  $E_{\text{LUMO(VB)}} = -e(E_{\text{re}} + 4.8 - E_{1/2}^{\text{(Fc/Fc+)}})$  (eV) respectively, where  $E_{\text{re}}$  and  $E_{\text{ox}}$  are the onset of the reduction and oxidation potential vs the SCE.  $E_{1/2}^{\text{(Fc/Fc+)}} = 0.29$  V vs SCE,  $E_{\text{g}}^{\text{a}} = E_{\text{LUMO}} - E_{\text{HOMO}}$ .

**Table S5** Summary of reported heterojunction photocatalysts for hydrogen evolution rates.

| Catalyst                      | Co-catalyst | Sacrificial agent | Illumination           | HER ( $\text{mmol h}^{-1} \text{g}^{-1}$ ) | Ref       |
|-------------------------------|-------------|-------------------|------------------------|--------------------------------------------|-----------|
| PSO@NiFeLDH                   | -           | TEOA              | >420 nm<br>(Xe, 300 W) | 52.80                                      | This work |
| $\text{WO}_3$ @TpPa-1-COF/rGO | Pt          | ascorbic acid     | >420 nm                | 26.73                                      | S1        |

|                                                             |                                                   |                                                   |                        |        |     |
|-------------------------------------------------------------|---------------------------------------------------|---------------------------------------------------|------------------------|--------|-----|
|                                                             |                                                   |                                                   | (Xe, 300 W)            |        |     |
| Cd/Ni-MOFs                                                  | -                                                 | lactic acid                                       | >420 nm<br>(Xe, 300 W) | 42.76  | S2  |
| CdS-NiPc                                                    | -                                                 | lactic acid                                       | >420 nm<br>(Xe, 300 W) | 17.74  | S3  |
| CZ <sub>0.5</sub> S@50ZS-3N/8CN                             | Ni <sub>2</sub> P/g-C <sub>3</sub> N <sub>4</sub> | Na <sub>2</sub> S/Na <sub>2</sub> SO <sub>3</sub> | >420 nm<br>(Xe, 300 W) | 55.43  | S4  |
| PDBTZO/TiO <sub>2</sub>                                     | Pt                                                | TEOA                                              | >420 nm<br>(Xe, 300 W) | 51.50  | S5  |
| CNS-COF                                                     | Pt                                                | TEOA                                              | >420 nm<br>(Xe, 300 W) | 46.40  | S6  |
| Zn <sub>0.5</sub> Cd <sub>0.5</sub> S/ZIF-67                | -                                                 | lactic acid                                       | >420 nm<br>(Xe, 300 W) | 23.26  | S7  |
| ZIF2@CdS100                                                 | -                                                 | lactic acid                                       | >420 nm<br>(Xe, 300 W) | 17.19  | S8  |
| Flu-DFBZ/g-C <sub>3</sub> N <sub>4</sub>                    | Pt                                                | TEOA                                              | >420 nm<br>(Xe, 300 W) | 14.85  | S9  |
| Zn <sub>x</sub> Cd <sub>1-x</sub> S                         | -                                                 | Na <sub>2</sub> S/Na <sub>2</sub> SO <sub>3</sub> | >420 nm<br>(Xe, 300 W) | 13.46  | S10 |
| CdS-CTF-1                                                   | Pt                                                | lactic acid                                       | >420 nm<br>(Xe, 300 W) | 11.43  | S11 |
| TiO <sub>2</sub> -TpPa-1-COF                                | Pt                                                | ascorbic acid                                     | >420 nm<br>(Xe, 300 W) | 11.19  | S12 |
| NH <sub>2</sub> -MIL-125(Ti)/ZnCr-LDH                       | Pt                                                | TEOA                                              | >420 nm<br>(Xe, 300 W) | 127.60 | S13 |
| WO <sub>3-x</sub> /Ag/ZnCrLDH                               | -                                                 | CH <sub>3</sub> OH                                | >420 nm<br>(Xe, 150 W) | 29.37  | S14 |
| Ni <sub>2</sub> P/Ni@C/g-C <sub>3</sub> N <sub>4</sub> -550 | -                                                 | TEOA                                              | >420 nm<br>(Xe, 300 W) | 18.40  | S15 |



|                                                                               |    |                                                   |                        |       |     |
|-------------------------------------------------------------------------------|----|---------------------------------------------------|------------------------|-------|-----|
| NiS/Zn <sub>0.5</sub> Cd <sub>0.5</sub> S                                     | -  | Na <sub>2</sub> S/Na <sub>2</sub> SO <sub>3</sub> | >420 nm<br>(Xe, 300 W) | 16.78 | S16 |
| Zn <sub>0.5</sub> Cd <sub>0.5</sub> S/ZnO/Zn <sub>0.5</sub> Cd <sub>0.5</sub> | -  | Na <sub>2</sub> S/Na <sub>2</sub> SO <sub>3</sub> | >420 nm<br>(Xe, 300 W) | 28.60 | S17 |
| BE-Au-TiO <sub>2</sub>                                                        | Au | TEOA                                              | >420 nm<br>(Xe, 300 W) | 26.04 | S18 |
| NH <sub>2</sub> -UiO-66/TpPa-1-COF                                            | Pt | ascorbic acid                                     | >420 nm<br>(Xe, 300 W) | 23.41 | S19 |
| $\alpha$ -Fe <sub>2</sub> O <sub>3</sub> /g-C <sub>3</sub> N <sub>4</sub>     | Pt | TEOA                                              | >420 nm<br>(Xe, 300 W) | 31.40 | S20 |
| Co-Doped Zn <sub>0.5</sub> Cd <sub>0.5</sub> S                                | -  | Na <sub>2</sub> S/Na <sub>2</sub> SO <sub>3</sub> | >420 nm<br>(Xe, 300 W) | 17.36 | S21 |

**Table S6** ICP-MS for PSO@NiFeLDH-15 and reused PSO@NiFeLDH-15 after reaction.

| Sample                | Ni (%) | Fe (%) |
|-----------------------|--------|--------|
| PSO@NiFeLDH-15        | 4.09   | 0.61   |
| Reused PSO@NiFeLDH-15 | 3.45   | 0.51   |

**Table S7** Fitted decay time of PSO and PSO@NiFeLDH-15.

| Sample         | $\tau_1$ (ns) | Rel (%) | $\tau_2$ (ns) | Rel (%) | $\tau$ (ns) |
|----------------|---------------|---------|---------------|---------|-------------|
| PSO            | 0.704         | 56.75   | 3.188         | 43.25   | 1.321       |
| PSO@NiFeLDH-15 | 0.781         | 49.14   | 3.778         | 50.86   | 1.742       |

## References:

- S1. H. Yan, Y. H. Liu, Y. Yang, H. Y. Zhang, X. R. Liu, J. Z. Wei, L. L. Bai, Y. Wang and F. M. Zhang, *Chem. Eng. J.*, 2022, **431**, 133404.

- S2. C. F. Liu, Y. Y. Liu, Z. H. Xiang, D. H. Liu and Q. Y. Yang, *Ind. Eng. Chem. Res.*, 2021, **60**, 11439–11449.
- S3. J. L. Sheng, C. Q. Wang, F. Duan, S. R. Yan, S. L. Lu, H. Zhu, M. L. Du, X. Chen and M. Q. Chen, *Catal. Sci. Technol.*, 2021, **11**, 7683–7693.
- S4. X. W. Ma, Q. Q. Ruan, J. K. Wu, Y. Zuo, X. P. Pu, H. F. Lin, X. J. Yi, Y. Y. Li and L. Wang, *Dalton Trans.*, 2020, **49**, 6259–6269.
- S5. G. Shu, Y. Wang, Y. D. Li, S. Zhang, J. X. Jiang and F. Wang, *J. Mater. Chem. A*, 2020, **8**, 18292–18301.
- S6. M. L. Luo, Q. Yang, W. B. Yang, J. H. Wang, F. F. He, K. W. Liu, H. M. Cao and H. J. Yan, *Small*, 2020, **16**, 2001100.
- S7. H. M. Gong, X. J. Zhang, G. R. Wang, Y. Liu, Y. B. Li and Z. L. Jin, *Mol. Catal.*, 2020, **485**, 110832.
- S8. Z. B. Yu, L. Qian, T. Zhong, Q. Ran, J. Huang, Y. P. Hou, F. Y. Li, M. J. Li, Q. Q. Sun and H. Q. Zhang, *Mol. Catal.*, 2020, **485**, 110797.
- S9. H. N. Ye, Z. Q. Wang, F. T. Yu, S. C. Zhang, K. Y. Kong, X. Q. Gong, J. L. Hua and H. Tian, *Appl. Catal., B*, 2020, **267**, 118577.
- S10. K. Q. Li, H. L. Xiong, X. Wang, Y. L. Ma, T. N. Gao, Z. L. Liu, Y. L. Liu, M. H. Fan, L. Zhang and Z. A. Qiao, *Inorg. Chem.*, 2020, **59**, 5063–5071.
- S11. D. Wang, H. Zeng, X. Xiong, M. F. Wu, M. Xia, M. Xie, J. P. Zou and S. L. Luo, *Sci. Bull.*, 2020, **65**, 113–122.
- S12. C. C. Li, M. Y. Gao, X. J. Sun, H. L. Tang, H. Dong and F. M. Zhang, *Appl. Catal., B*, 2020, **266**, 118586.
- S13. M. Sohail, H. Kim and T. W. Kim, *Sci. Rep.*, 2019, **9**, 7584.
- S14. D. P. Sahoo, S. Patnaik and K. Parida, *ACS Omega*, 2019, **4**, 14721–14741.
- S15. J. X. Xu, Y. H. Qi and L. Wang, *Appl. Catal., B*, 2019, **246**, 72–81.
- S16. X. X. Zhao, J. R. Feng, J. Liu, W. Shi, G. M. Yang, G. C. Wang and P. Cheng, *Angew. Chem., Int. Ed.*, 2018, **130**, 9938–9942.
- S17. J. M. Chen, Z. R. Shen, S. M. Lv, K. Shen, R. F. Wu, X. F. Jiang, T. Fan, J. Y. Chen and Y. W. Li, *J. Mater. Chem. A*, 2018, **6**, 19631–19642.
- S18. J. Xiao, Y. Z. Luo, Z. X. Yang, Y. G. Xiang, X. H. Zhang and H. Chen, *Catal. Sci. Technol.*,

2018, **8**, 2477–2487.

S19. F. M. Zhang, J. L. Sheng, Z. D. Yang, X. J. Sun, H. L. Tang, M. Lu, H. Dong, F. C. Shen, J.

Liu and Y. Q. Lan, *Angew. Chem., Int. Ed.*, 2018, **57**, 12106–12110.

S20. X. J. She, J. J. Wu, H. Xu, J. Zhong, Y. Wang, Y. H. Song, K. Q. Nie, Y. Liu, Y. C. Yang

and M. T. F. Rodrigues, *Adv. Energy Mater.*, 2017, **7**, 1700025.

S21. X. Tang, J. H. Zhao, Y. H. Li, Z. J. Zhou, K. Li, F. T. Liu and Y. Q. Lan, *Dalton Trans.*,

2017, **46**, 10553–10557.
